# Supplementary material for: Injectable pH and Thermo‐Responsive Hydrogel Scaffold with Enhanced Osteogenic Differentiation of Preosteoblasts for Bone Regeneration
Source: Preprints.org preprint supplement (doi:10.20944/preprints202307.1379.v1), 2023-07-20
Supplement: Supplementary file 1 [file supplementary]

Article

Injectable pH and thermo-responsive hydrogel scaffold with enhanced osteogenic differentiation of preosteoblasts for bone regeneration

Jasmine L. King 1, Roopali Shirvastava 2, Pooja D. Shah 2, Panita Maturavongsadit 2, and S. Rahima Benhabbour 1,2,*

| **Citation:** To be added by editorial staff during production.  Academic Editor: Firstname Lastname  Received: date  Revised: date  Accepted: date  Published: date  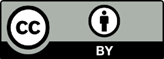  **Copyright:** © 2023 by the authors. Submitted for possible open access publication under the terms and conditions of the Creative Commons Attribution (CC BY) license (https://creativecommons.org/licenses/by/4.0/). |
| --- |

1 Division of Pharmacoengineering and Molecular Pharmaceutics, UNC Eshelman School of Pharmacy, University of North Carolina at Chapel Hill, Chapel Hill, NC, 27599, USA; jking116@email.unc.edu

2 Joint Department of Biomedical Engineering, North Carolina State University and The University of North Carolina at Chapel Hill, Chapel Hill, NC 27599, USA; roopalis@email.unc.edu (R.S.); pdshah1@email.unc.edu (P.D.S.); panita.maturavong@gmail.com (P.M.)

***** Correspondence: benhabs@email.unc.edu Tel.: +1-919-843-6142

**Supplementary Figure 1. In vitro cell viability of MC3T3-E1 CS and CNC-CS hydrogels.** Confocal fluorescent images of MC3T3-E1 cells (107 – 2 × 107 in CS and CNC-CS hydrogels (*n* =3; 50 μL samples).

**Supplementary Figure 2.** Non-uniform distribution of MC3T3-E1 cells within CNC-CS hydrogels at high cell seeding densities.Luer-lock syringes of MC3T3-E1 cells encapsulated in CS and CNC-CS hydrogels at cell densities of 107 – 2 × 107.

**Supplementary Figure 3.** ALP activity of cell-laden CS and CS-CNC hydrogels over 21-day study period.Graphical representation of 5, 10, and 20 million MC3T3-E1 cells in 1 mL CS hydrogel and 5 and 10 million MC3T3-E1 cells in 1 mL CS-CNC hydrogel (* indicates *p* < 0.05 and ** indicates *p* < 0.005). There were no intact scaffolds at day 7 for 15 to 20 million CS-CNC hydrogels (no data included).
